# Supplementary material for: Cost-effectiveness of a direct to beneficiary mobile communication programme in improving reproductive and child health outcomes in India
Source: HighWire-hosted journal article supplement (doi:10.1136/bmjgh-2022-009553), 2023-03-01
Supplement: bmjgh-2022-009553supp002_data_supplement.pdf [file bmjgh-2022-009553supp002_data_supplement.pdf]

Supplementary Table 1. Coverage estimates inputted into LiST drawn from the Kilkari Impact Evaluation in four districts of Madhya Pradesh

| Health behaviours           | Coverage across study arms |     |     |            |     |     | Coverage across exposed vs. not exposed |     |     |             |     |     | Incremental change in coverage |     |     |                       |    |     |
|-----------------------------|----------------------------|-----|-----|------------|-----|-----|-----------------------------------------|-----|-----|-------------|-----|-----|--------------------------------|-----|-----|-----------------------|----|-----|
|                             | Intervention               |     |     | Comparison |     |     | Exposed                                 |     |     | Not exposed |     |     | Intervention - Comparison      |     |     | Exposed - Not exposed |    |     |
|                             | Base case                  | UL  | LL  | Base case  | UL  | LL  | Base case                               | UL  | LL  | Base case   | UL  | LL  | Base case                      | UL  | LL  | Base case             | UL | LL  |
| Child 10 week immunisations | 75%                        | 73% | 77% | 72%        | 70% | 74% | 75%                                     | 72% | 78% | 73%         | 72% | 74% | 3%                             | 3%  | 3%  | 2%                    | 1% | 4%  |
| Condom use                  | 27%                        | 24% | 29% | 24%        | 22% | 26% | 34%                                     | 30% | 38% | 24%         | 23% | 26% | 3%                             | 2%  | 3%  | 10%                   | 7% | 13% |
| Female sterilisation        | 13%                        | 12% | 14% | 15%        | 13% | 16% | 10%                                     | 8%  | 13% | 14%         | 13% | 15% | -2%                            | -2% | -2% | -4%                   | -  | -2% |
| Male sterilisation          | 0%                         | 0%  | 1%  | 0%         | 0%  | 0%  | 0%                                      | 0%  | 1%  | 0%          | 0%  | 0%  | 0%                             | 0%  | 0%  | 0%                    | 0% | 0%  |
| Injectable                  | 2%                         | 1%  | 2%  | 2%         | 1%  | 2%  | 3%                                      | 2%  | 5%  | 1%          | 1%  | 2%  | 0%                             | 0%  | 0%  | 2%                    | 1% | 4%  |
| Intrauterine device         | 3%                         | 3%  | 4%  | 3%         | 2%  | 4%  | 4%                                      | 3%  | 6%  | 3%          | 3%  | 4%  | 0%                             | 0%  | 0%  | 1%                    | 0% | 3%  |
| Oral contraceptive pill     | 5%                         | 4%  | 6%  | 4%         | 3%  | 5%  | 5%                                      | 3%  | 7%  | 4%          | 4%  | 5%  | 1%                             | 1%  | 1%  | 0%                    | 0% | 2%  |
| Withdrawal                  | 17%                        | 16% | 19% | 17%        | 15% | 19% | 20%                                     | 16% | 23% | 17%         | 16% | 18% | 0%                             | 0%  | 0%  | 3%                    | 1% | 6%  |
| Abstinence                  | 22%                        | 20% | 23% | 22%        | 20% | 23% | 22%                                     | 19% | 26% | 22%         | 20% | 23% | 0%                             | 0%  | 0%  | 0%                    | -  | 3%  |
| Rhythm method               | 30%                        | 28% | 32% | 30%        | 28% | 32% | 30%                                     | 27% | 35% | 30%         | 29% | 31% | 0%                             | 0%  | 0%  | 0%                    | -  | 3%  |

UL: Upper limit

LL: Lower limit

Supplementary Table 2. LiST population input parameters

| State            | Total population     | Eligible* for Kilkari | Eligibility adjusted population |
|------------------|----------------------|-----------------------|---------------------------------|
| Assam            | 55 218 267           | 46%                   | 25 400 403                      |
| Bihar            | 175 836 168          | 3%                    | 5 275 085                       |
| Chattisgarh      | 55 677 340           | 19%                   | 10 578 695                      |
| Delhi            | 29 262 861           | 77%                   | 22 532 403                      |
| Haryana          | 43 523 846           | 30%                   | 13 057 154                      |
| Himachal Pradesh | 11 784 520           | 66%                   | 7 777 783                       |
| Jharkhand        | 49 841 153           | 2%                    | 996 823                         |
| Madhya Pradesh   | 109 730 483          | 18%                   | 19 751 487                      |
| Odisha           | 63 418 058           | 32%                   | 20 293 779                      |
| Rajasthan        | 104 460 771          | 25%                   | 26 115 193                      |
| Uttarakhand      | 15 370 472           | 36%                   | 5 533 370                       |
| Uttar Pradesh    | 301 892 716          | 8%                    | 24 151 417                      |
| West Bengal      | 156 817 423          | 75%                   | 117 613 067                     |
| <b>Total</b>     | <b>1 172 834 078</b> |                       | <b>299 076 658</b>              |

\* Eligibility is defined as the percentage of pregnancies included in government tracking registries

Supplementary Table 3. Parameters for 2016 Kilkari program costs and effects for implementation across 13 states

| Parameter                               | Deterministic       |                     |                     | Distribution        | Probabilistic | Mean         | SD         |
|-----------------------------------------|---------------------|---------------------|---------------------|---------------------|---------------|--------------|------------|
|                                         | Base case           | High                | Low                 |                     |               |              |            |
| <b>Capital costs</b>                    |                     |                     |                     |                     |               |              |            |
| Infrastructure                          | \$ 170 417          | \$ 187 458,15       | \$ 153 374,85       | Gamma               | 155 122,88    | 170 416,50   | 8 520,83   |
| IVR licensing and professional services | \$ 64 028           | \$ 70 430,69        | \$ 57 625,11        | Gamma               | 61 563,29     | 64 027,90    | 3 201,40   |
| Audio content creation                  | \$ 14 543           | \$ 15 997,53        | \$ 13 088,89        | Gamma               | 14 143,01     | 14 543,21    | 727,16     |
| Data center                             | \$ 28 949           | \$ 31 844,00        | \$ 26 054,18        | Gamma               | 28 899,36     | 28 949,09    | 1 447,45   |
| Technology support                      | \$ 26 061           | \$ 28 667,60        | \$ 23 455,31        | Gamma               | 25 960,97     | 26 061,45    | 1 303,07   |
| BBC MA Computers                        | \$ 2 266            | \$ 2 492,09         | \$ 2 038,98         | Gamma               | 2 089,66      | 2 265,53     | 113,28     |
| <b>Total capital costs</b>              | <b>\$ 306 264</b>   | <b>\$ 336 890</b>   | <b>\$ 275 637</b>   | Gamma               | 308 969,46    | 306 263,69   | 15 313,18  |
| <b>Recurrent costs</b>                  |                     |                     |                     |                     |               |              |            |
| Kilkari call costs                      | \$ 633 701          | \$ 697 071          | \$ 570 331          | Gamma               | 613 693,95    | 633 701,01   | 31 685,05  |
| BBC MA Personnel                        | \$ 386 194          | \$ 424 814          | \$ 347 575          | Gamma               | 353 545,36    | 386 194,12   | 19 309,71  |
| Project management unit                 | \$ 412 347          | \$ 453 581          | \$ 371 112          | Gamma               | 371 970,55    | 412 346,73   | 20 617,34  |
| Technical support                       | \$ 265 227          | \$ 291 750          | \$ 238 705          | Gamma               | 252 802,15    | 265 227,33   | 13 261,37  |
| Indirect costs                          | \$ 73 955           | \$ 81 351           | \$ 66 560           | Gamma               | 74 408,22     | 73 955,26    | 3 697,76   |
| BBC MA office costs                     | \$ 112 736          | \$ 124 009          | \$ 101 462          | Gamma               | 110 065,58    | 112 735,50   | 5 636,78   |
| BBC MA management fees                  | \$ 69 572           | \$ 76 529           | \$ 62 615           | Gamma               | 72 144,58     | 69 571,85    | 3 478,59   |
| Travel                                  | \$ 39 862           | \$ 43 849           | \$ 35 876           | Gamma               | 40 959,62     | 39 862,49    | 1 993,12   |
| Other costs: donor audit, taxes, misc.  | \$ 36 736           | \$ 40 410           | \$ 33 063           | Gamma               | 35 625,29     | 36 736,23    | 1 836,81   |
| Communications                          | \$ 4 972            | \$ 5 469            | \$ 4 475            | Gamma               | 4 593,45      | 4 971,82     | 248,59     |
| <b>Total recurrent costs</b>            | <b>\$ 2 035 302</b> | <b>\$ 2 238 833</b> | <b>\$ 1 831 772</b> | Gamma               | 2 198 571,31  | 2 035 302,34 | 101 765,12 |
| <b>Total costs</b>                      | <b>\$ 2 566 259</b> | <b>\$ 2 822 885</b> | <b>\$ 2 309 633</b> | Gamma               | 2 594 245,39  | 2 566 259,18 | 128 312,96 |
| <b>Maternal lives saved</b>             |                     |                     |                     |                     |               |              |            |
|                                         |                     |                     |                     | <b>Distribution</b> |               |              |            |
| Jharkhand                               | 2                   | 2                   | 1                   | Lognormal           | 2,20          | 2            | 0,25       |
| Madhya Pradesh                          | 30                  | 32                  | 26                  | Lognormal           | 31,66         | 30           | 1,50       |
| Odisha                                  | 22                  | 23                  | 19                  | Lognormal           | 22,59         | 22           | 1,00       |
| Rajasthan                               | 39                  | 42                  | 34                  | Lognormal           | 38,96         | 39           | 2,00       |
| Uttarakhand                             | 8                   | 9                   | 7                   | Lognormal           | 8,89          | 8            | 0,50       |
| Uttar Pradesh                           | 48                  | 51                  | 42                  | Lognormal           | 49,41         | 48           | 2,25       |
| Total maternal lives saved              | <b>149,00</b>       | <b>159,00</b>       | <b>129,00</b>       | Lognormal           | 167,75        | 149          | 7,50       |
| <b>&lt;5 lives saved</b>                |                     |                     |                     |                     |               |              |            |
| Jharkhand                               | 28                  | 30                  | 25                  | Lognormal           | 29,60         | 28           | 1,25       |
| Madhya Pradesh                          | 510                 | 547                 | 444                 | Lognormal           | 504,63        | 510          | 25,75      |
| Odisha                                  | 380                 | 405                 | 338                 | Lognormal           | 384,68        | 380          | 16,75      |
| Rajasthan                               | 661                 | 709                 | 575                 | Lognormal           | 716,86        | 661          | 33,50      |
| Uttarakhand                             | 138                 | 148                 | 120                 | Lognormal           | 130,81        | 138          | 7,00       |

|                          |                 |                 |                 |                  |                 |             |               |
|--------------------------|-----------------|-----------------|-----------------|------------------|-----------------|-------------|---------------|
| Uttar Pradesh            | 826             | 888             | 720             | Lognormal        | 912,07          | 826         | 42,00         |
| Total <5 lives saved     | 2 543,00        | 2 727,00        | 2 222,00        | Lognormal        | 2 809,90        | 2543        | 126,25        |
| <b>Total lives saved</b> | <b>2 692,00</b> | <b>2 886,00</b> | <b>2 351,00</b> | <b>Lognormal</b> | <b>2 937,32</b> | <b>2692</b> | <b>133,75</b> |

Supplementary Table 4. Parameters for 2017 Kilkari program costs and effects for implementation across 13 states

| Parameter                               | Deterministic<br>Base case | High                  | Low                   | Distribution     | Probabilistic         | Mean                  | SD                  |
|-----------------------------------------|----------------------------|-----------------------|-----------------------|------------------|-----------------------|-----------------------|---------------------|
| <b>Capital costs</b>                    |                            |                       |                       |                  |                       |                       |                     |
| Infrastructure                          | \$170 454                  | \$187 498,86          | \$153 408,16          | Gamma            | \$154 306,62          | \$170 453,51          | \$8 522,68          |
| IVR licensing and professional services | \$64 087                   | \$70 496,04           | \$57 678,58           | Gamma            | \$65 823,20           | \$64 087,31           | \$3 204,37          |
| Audio content creation                  | \$34 667                   | \$38 133,25           | \$31 199,93           | Gamma            | \$36 667,86           | \$34 666,59           | \$1 733,33          |
| Data center                             | \$28 949                   | \$31 844,00           | \$26 054,18           | Gamma            | \$28 696,04           | \$28 949,09           | \$1 447,45          |
| Technology support                      | \$26 061                   | \$28 667,60           | \$23 455,31           | Gamma            | \$26 876,36           | \$26 061,45           | \$1 303,07          |
| BBC MA Computers                        | \$3 785                    | \$4 163,14            | \$3 406,21            | Gamma            | \$3 471,88            | \$3 784,67            | \$189,23            |
| <b>Total capital costs</b>              | <b>\$328 003</b>           | <b>\$327 972</b>      | <b>\$268 341</b>      | <b>Gamma</b>     | <b>332 617,84</b>     | <b>328 002,62</b>     | <b>14 907,82</b>    |
| <b>Recurrent costs</b>                  |                            |                       |                       |                  |                       |                       |                     |
| Kilkari call costs                      | \$639 658                  | \$703 624,03          | \$575 692,39          | Gamma            | \$742 440,64          | \$639 658,21          | \$31 982,91         |
| BBC MA Personnel                        | \$545 363                  | \$599 899,17          | \$490 826,59          | Gamma            | \$543 134,31          | \$545 362,88          | \$27 268,14         |
| Project management unit                 | \$464 645                  | \$511 109,28          | \$418 180,32          | Gamma            | \$459 413,13          | \$464 644,80          | \$23 232,24         |
| Technical support                       | \$282 735                  | \$311 008,78          | \$254 461,73          | Gamma            | \$267 605,41          | \$282 735,25          | \$14 136,76         |
| Indirect costs                          | \$101 056                  | \$111 161,63          | \$90 950,43           | Gamma            | \$96 530,35           | \$101 056,03          | \$5 052,80          |
| BBC MA office costs                     | \$98 178                   | \$107 995,60          | \$88 360,04           | Gamma            | \$90 693,99           | \$98 177,82           | \$4 908,89          |
| BBC MA management fees                  | \$39 910                   | \$43 901,30           | \$35 919,24           | Gamma            | \$41 205,29           | \$39 910,27           | \$1 995,51          |
| Travel                                  | \$44 356                   | \$48 791,54           | \$39 920,35           | Gamma            | \$42 039,13           | \$44 355,95           | \$2 217,80          |
| Other costs: donor audit, taxes, misc.  | \$60 644                   | \$66 708,28           | \$54 579,50           | Gamma            | \$62 446,05           | \$60 643,89           | \$3 032,19          |
| Communications                          | \$6 857                    | \$7 542,82            | \$6 171,40            | Gamma            | \$6 658,09            | \$6 857,11            | \$342,86            |
| Dissemination, workshops                | \$3 137                    | \$3 450,53            | \$2 823,16            | Gamma            | \$3 105,92            | \$3 136,84            | \$156,84            |
| <b>Total recurrent costs</b>            | <b>\$2 286 539</b>         | <b>\$2 437 491</b>    | <b>\$1 994 311</b>    | <b>Gamma</b>     | <b>2 332 531,82</b>   | <b>2 286 539,04</b>   | <b>110 795,06</b>   |
| <b>Total costs</b>                      | <b>\$2 871 906,45</b>      | <b>\$3 126 266,35</b> | <b>\$2 557 854,29</b> | <b>Gamma</b>     | <b>\$2 994 790,84</b> | <b>\$2 871 906,45</b> | <b>\$142 103,02</b> |
| <b>Maternal lives saved</b>             |                            |                       |                       | Distribution     |                       |                       |                     |
| Jharkhand                               | 1                          | 2                     | 1                     | Lognormal        | 0,84                  | 1                     | 0,25                |
| Madhya Pradesh                          | 30                         | 31                    | 26                    | Lognormal        | 29,53                 | 30                    | 1,25                |
| Odisha                                  | 24                         | 25                    | 21                    | Lognormal        | 23,92                 | 24                    | 1,00                |
| Rajasthan                               | 38                         | 40                    | 34                    | Lognormal        | 37,23                 | 38                    | 1,50                |
| Uttarakhand                             | 8                          | 9                     | 7                     | Lognormal        | 7,43                  | 8                     | 0,50                |
| Uttar Pradesh                           | 47                         | 50                    | 42                    | Lognormal        | 46,12                 | 47                    | 2,00                |
| <b>Total maternal lives saved</b>       | <b>148</b>                 | <b>157</b>            | <b>131</b>            | <b>Lognormal</b> | <b>145,64</b>         | <b>148</b>            | <b>6,50</b>         |
| <b>&lt;5 lives saved</b>                |                            |                       |                       |                  |                       |                       |                     |
| Jharkhand                               | 38                         | 40                    | 34                    | Lognormal        | 39,41                 | 38                    | 1,50                |
| Madhya Pradesh                          | 631                        | 670                   | 557                   | Lognormal        | 608,22                | 631                   | 28,25               |
| Odisha                                  | 523                        | 554                   | 466                   | Lognormal        | 547,36                | 523                   | 22,00               |

|                          |              |              |              |                  |                 |             |               |
|--------------------------|--------------|--------------|--------------|------------------|-----------------|-------------|---------------|
| Rajasthan                | 815          | 866          | 719          | Lognormal        | 777,20          | 815         | 36,75         |
| Uttarakhand              | 167          | 177          | 148          | Lognormal        | 172,21          | 167         | 7,25          |
| Uttar Pradesh            | 1 036        | 1 102        | 913          | Lognormal        | 999,04          | 1036        | 47,25         |
| Total <5 lives saved     | 3 210        | 3 409        | 2 837        | Lognormal        | 3 390,21        | 3210        | 143,00        |
| <b>Total lives saved</b> | <b>3 358</b> | <b>3 566</b> | <b>2 968</b> | <b>Lognormal</b> | <b>3 299,36</b> | <b>3358</b> | <b>149,50</b> |
